# Supplementary material for: Atomic-scale evidence for highly selective electrocatalytic N−N coupling on metallic MoS2
Source: PubMed Central journal article supplement — Proc Natl Acad Sci U S A. 2020 Nov 30;117(50):31631–8. doi: 10.1073/pnas.2008429117 (PMC7749309; doi:10.1073/pnas.2008429117), 2020-11-30
Supplement: pnas.2008429117.sapp.pdf [file pnas.2008429117.sapp.pdf]

# PNAS

[www.pnas.org](http://www.pnas.org)

Supplementary Information for

Atomic-scale Evidence for Highly Selective Electrocatalytic N–N Coupling on Metallic MoS<sub>2</sub>

Daoping He, Hideshi Ooka, Yujeong Kim, Yamei Li, Fangming Jin, Sun Hee Kim, Ryuhei Nakamura

Fangming Jin; Sun Hee Kim; Ryuhei Nakamura

Email: [fmjin@sjtu.edu.cn](mailto:fmjin@sjtu.edu.cn); [shkim7@kbsi.re.kr](mailto:shkim7@kbsi.re.kr); [ryuhei.nakamura@riken.jp](mailto:ryuhei.nakamura@riken.jp)

**This PDF file includes:**

Figures S1 to S14

Table S1

SI References

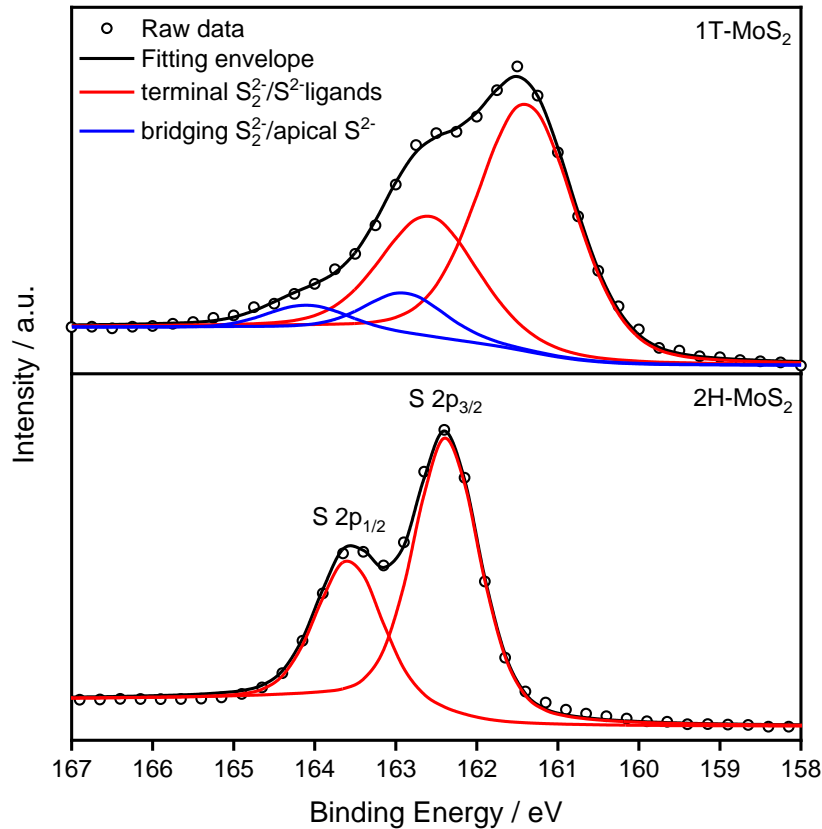

**Fig. S1.** XPS S 2*p* spectra of 1T-MoS<sub>2</sub> and 2H-MoS<sub>2</sub> and the deconvolution. The binding energies of the S 2*p* peaks are also shifted to smaller values for 1T-MoS<sub>2</sub>. The sulfur peak was also separated into two doublets. The doublet with lower binding energy reflects the terminal S<sub>2</sub><sup>2-</sup> and unsaturated S<sup>2-</sup>, while the higher binding energy doublet is associated with apical S<sup>2-</sup> and bridging S<sub>2</sub><sup>2-</sup> (1-3). By integrating the intensities of characteristic S 2*p*<sub>1/2</sub> and S 2*p*<sub>3/2</sub> peaks, the percentage of apical S<sup>2-</sup> and bridging S<sub>2</sub><sup>2-</sup> with respect to terminal S<sub>2</sub><sup>2-</sup> and unsaturated S<sup>2-</sup> for 1T-MoS<sub>2</sub> was found to be 12.1%, confirming the existence of more sulfur-terminated edges in 1T-MoS<sub>2</sub>. Detailed analysis of elemental compositions reveals that the atomic ratio of Mo:S is 1:1.9 for 1T-MoS<sub>2</sub> and 1:2.0 for 2H-MoS<sub>2</sub>, respectively.

**Table S1.** Summary of the structural parameters of 1T-MoS<sub>2</sub> and 2H-MoS<sub>2</sub>.

| Sample              | BE (Mo <sup>IV</sup> ) <sup>a)</sup>                      | Higher BE (S) <sup>b)</sup>                                 | Lower BE (S) <sup>c)</sup>                                  | Atomic ratio of Mo/S | Ratio of 1T phase | P <sup>d)</sup> |
|---------------------|-----------------------------------------------------------|-------------------------------------------------------------|-------------------------------------------------------------|----------------------|-------------------|-----------------|
| 2H-MoS <sub>2</sub> | 229.5 (3d <sub>5/2</sub> ),<br>232.7 (3d <sub>3/2</sub> ) | –                                                           | 162.37 (2p <sub>3/2</sub> ),<br>163.57 (2p <sub>1/2</sub> ) | 1:2.0                | 0%                | 0               |
| 1T-MoS <sub>2</sub> | 228.5 (3d <sub>5/2</sub> ),<br>231.7 (3d <sub>3/2</sub> ) | 162.89 (2p <sub>3/2</sub> ),<br>164.09 (2p <sub>1/2</sub> ) | 161.39 (2p <sub>3/2</sub> ),<br>162.59 (2p <sub>1/2</sub> ) | 1:1.9                | 55%               | 12.1%           |

<sup>a)</sup> BE: Binding Energy (eV); <sup>b)</sup> Higher BE (S): bridging S<sub>2</sub><sup>2-</sup> + apical S<sup>2-</sup>; <sup>c)</sup> Lower BE (S): terminal S<sub>2</sub><sup>2-</sup> + unsaturated S<sup>2-</sup>; <sup>d)</sup> P: percentage of higher binding energy S.

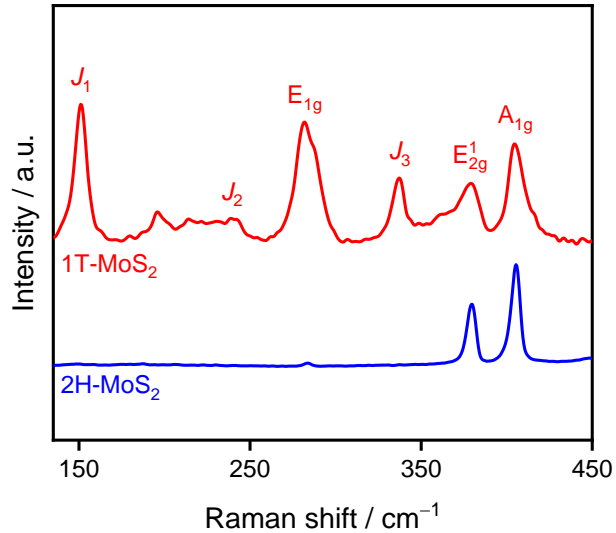

**Fig. S2.** Raman spectra of 1T-MoS<sub>2</sub> and 2H-MoS<sub>2</sub>. The in-plane Mo–S phonon mode (E<sub>2g</sub>) and out-of-plane S phonon mode (A<sub>1g</sub>) are located at 379 and 405 cm<sup>-1</sup>, respectively, confirming that 2H is the dominant phase for the commercial 2H-MoS<sub>2</sub> sample (4,5). In contrast, the 1T-MoS<sub>2</sub> sample shows additional peaks at 150 (J<sub>1</sub>), 239 (J<sub>2</sub>), and 337 cm<sup>-1</sup> (J<sub>3</sub>), respectively. The presence of these peaks is attributed to the superlattice structure in the Brillouin zone folding (6-8). Furthermore, the presence of the E<sub>1g</sub> peak at 282 cm<sup>-1</sup> confirms the dominant octahedral coordination of Mo in the 1T phase, together with the strong suppression of the E<sub>2g</sub> and A<sub>1g</sub> peaks (9). Experimental conditions: 532-nm laser; coadditions, 20 spectra; integration time, 10 s.

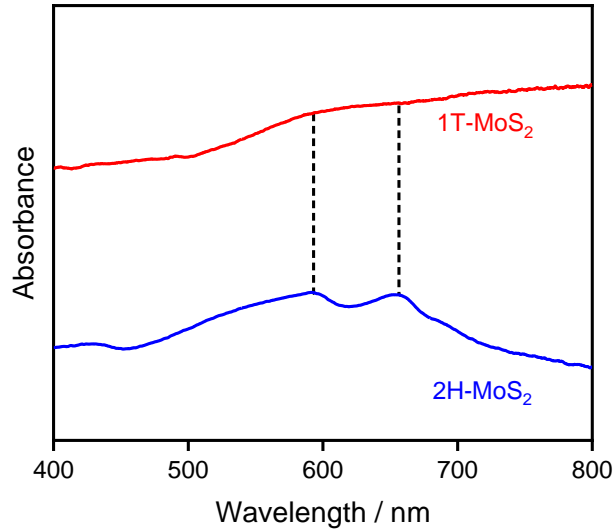

**Fig. S3.** UV-vis absorption spectra of 1T-MoS<sub>2</sub> and 2H-MoS<sub>2</sub>. The UV-vis spectra of 1T-MoS<sub>2</sub> and 2H-MoS<sub>2</sub> powder were collected in diffuse transmission mode. Two typical absorption peaks located at 593 and 655 nm were observed for 2H-MoS<sub>2</sub>. These peaks are assigned to the energy splitting from the valence band spin-orbital coupling, due to its semiconductive property (10). In contrast, the absorption spectrum of 1T-MoS<sub>2</sub> has no salient absorption bands but a monotonic change that is indicative of its metallic property (11).

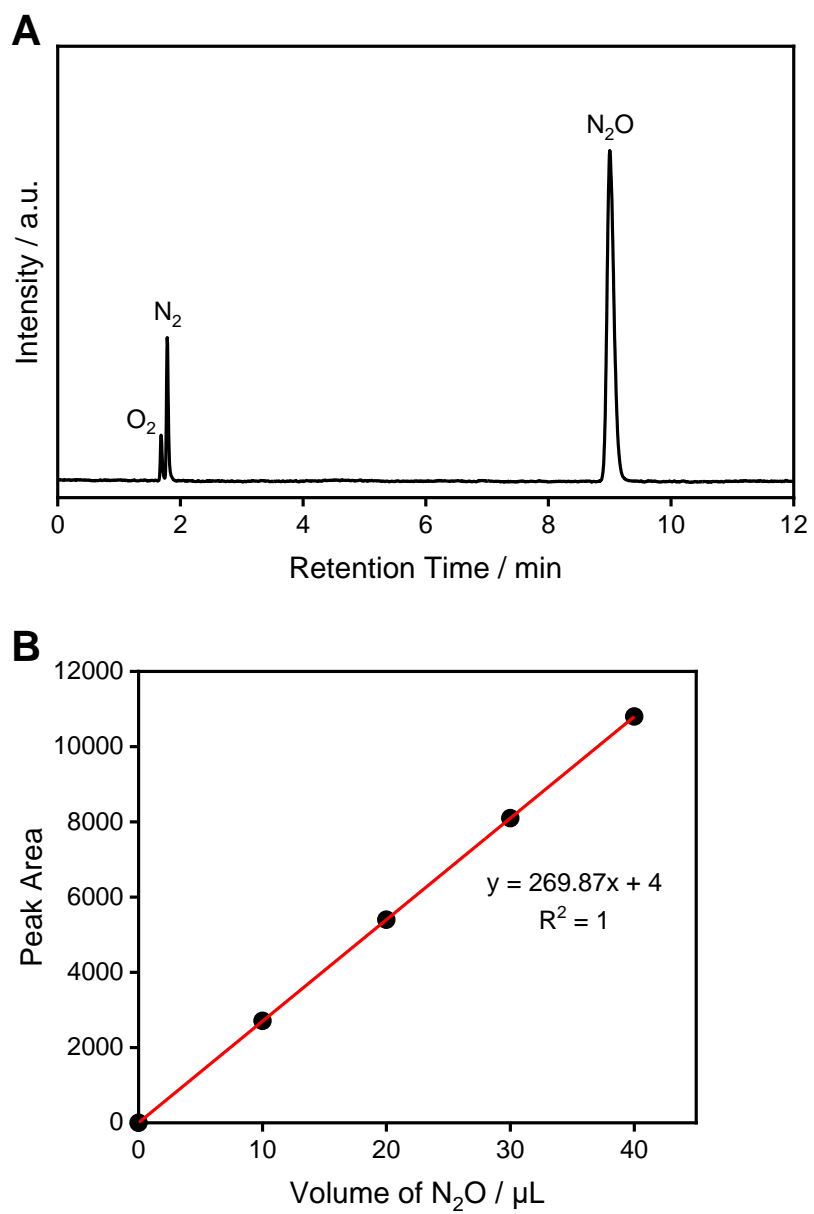

**Fig. S4.** GC calibration of  $N_2O$ . (A) Gas chromatography and (B) calibration curves of  $N_2O$ .

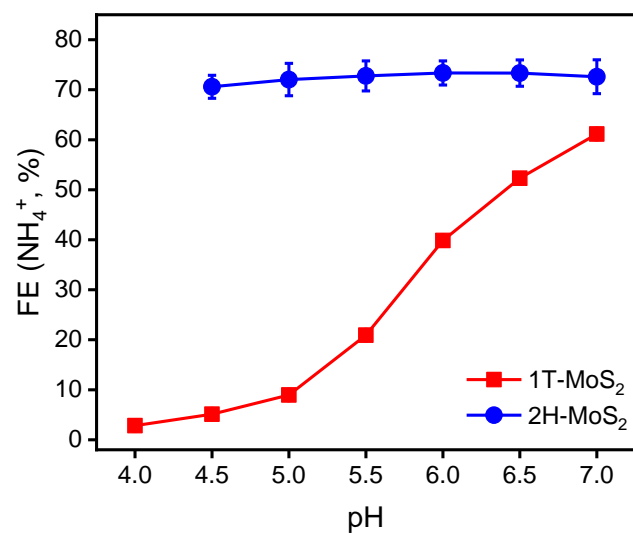

**Fig. S5.** Electroreduction of  $\text{NO}_2^-$  to  $\text{NH}_4^+$  on  $\text{MoS}_2$ . Faradaic efficiency of  $\text{NH}_4^+$  production via  $\text{NO}_2^-$  reduction (0.1 M) by 1T- $\text{MoS}_2$  and 2H- $\text{MoS}_2$  as a function of pH at 0.1 V vs RHE for 4 h.

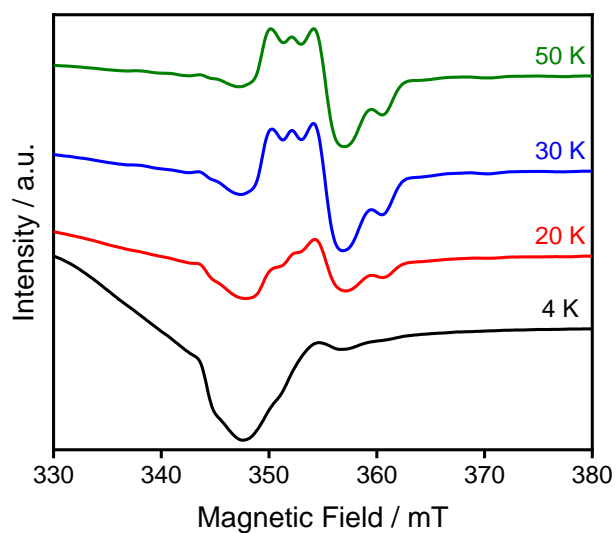

**Fig. S6.** Temperature-dependent EPR spectra of 1T-MoS<sub>2</sub>. Temperature-dependent EPR spectra of 1T-MoS<sub>2</sub> in 20 mM dithionite solution at pH 5. Experimental conditions: microwave frequency, 9.64 GHz; microwave power, 1 mW; modulation frequency, 100 kHz; modulation amplitude, 1.0 mT; time constant, 40.96 ms; conversion time, 48.00 ms; sweep time, 96 s; four scans.



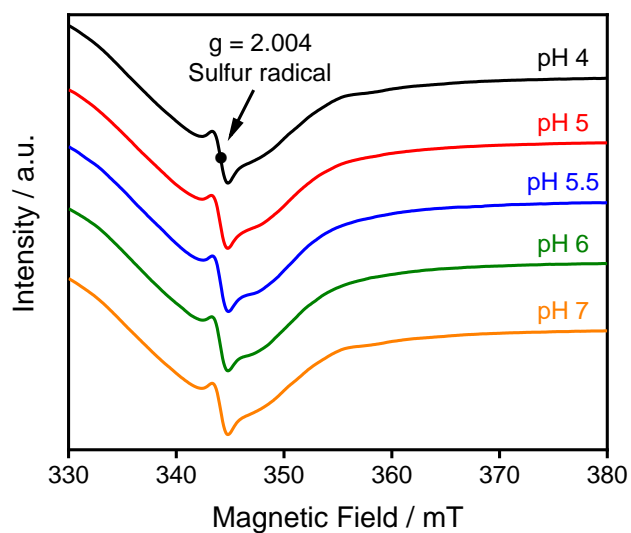

**Fig. S7.** EPR spectra of 1T-MoS<sub>2</sub> in the absence of dithionite. The EPR spectra of 1T-MoS<sub>2</sub> immersed in pure buffer solution. The buffer solution was prepared using either 0.2 M citric acid for pH 4, 5, and 5.5, or 0.2 M phosphate for pH 6 and 7, respectively. Experimental conditions: microwave frequency, 9.64 GHz; microwave power, 1 mW; modulation frequency, 100 kHz; modulation amplitude, 1.0 mT; time constant, 40.96 ms; conversion time, 48.00 ms; sweep time, 96 s; four scans.

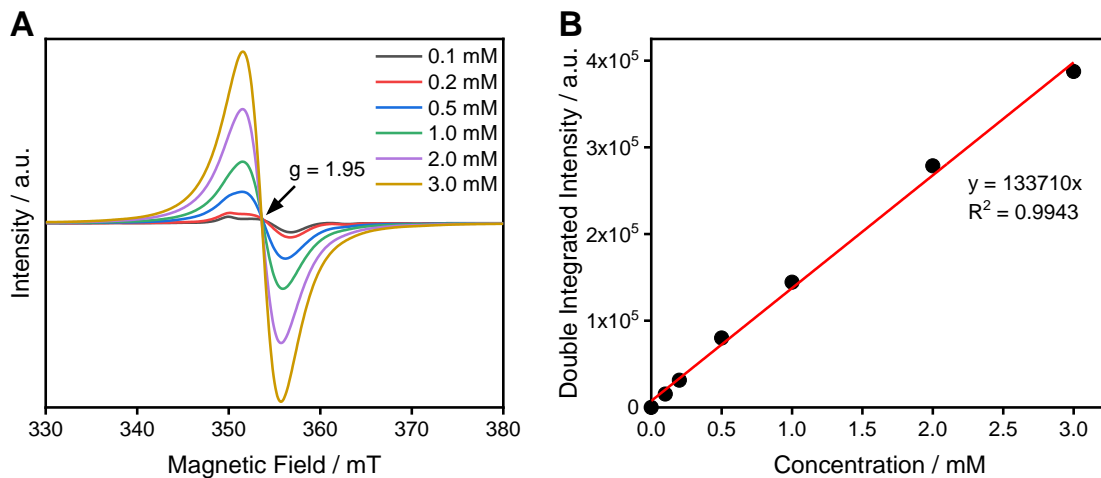

**Fig. S8.** EPR calibration of MoCl<sub>5</sub>. (A) EPR spectra and (B) calibration curve of MoCl<sub>5</sub>. The experiments were performed using Mo<sup>V</sup>Cl<sub>5</sub> dissolved in acetonitrile. The calibration curve was obtained by double integrating the Mo<sup>V</sup> EPR signal at different concentration of Mo<sup>V</sup> and the concentration of the catalyst was determined by the interpolation of the calibration curve. Experimental conditions: microwave frequency, 9.64 GHz; microwave power, 1 mW; modulation frequency, 100 kHz; modulation amplitude, 1.0 mT; time constant, 40.96 ms; conversion time, 48.00 ms; sweep time, 96 s; four scans; temperature, 30 K.

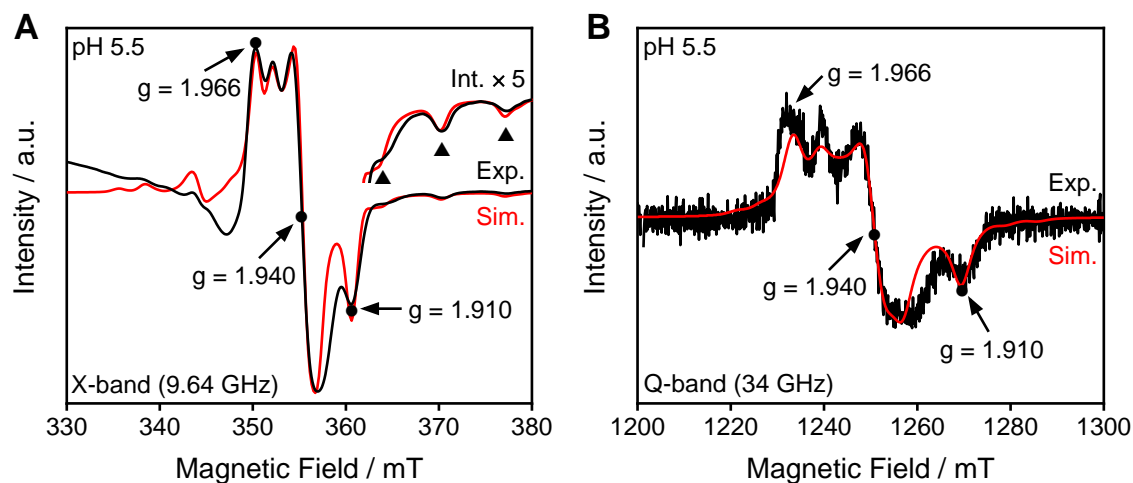

**Fig. S9.** EPR spectra of 1T-MoS<sub>2</sub> at pH 5.5. (A) X-band CW-EPR and (B) Q-band derivative ESE-detected EPR spectra of 1T-MoS<sub>2</sub> generated after reduction by 20 mM dithionite at pH 5.5. (black: experimental spectra, red: simulated spectra). To obtain detailed structural information of the pH-dependent Mo<sup>V</sup> species, X-band (9.6 GHz) and Q-band (34 GHz) CW-EPR experiments were carried out. At pH 5.5, the X-band and the Q-band EPR data display a rhombic signal with  $g = [1.966, 1.940, 1.910]$ , suggesting that the local geometry of the Mo<sup>V</sup> is significantly anisotropic. Clear low-intensity satellite peaks (indicated as solid triangles in the inset of A) were observed due to hyperfine coupling of <sup>95</sup>Mo ( $I = 5/2$ ) (12-15). We determine the hyperfine coupling constants of the <sup>95</sup>Mo to be  $A(^{95}\text{Mo}) = [130, < 50, 175]$  by simulating these satellite peaks. The spectrum is less sensitive to the  $A_2(^{95}\text{Mo})$  value, and does not change significantly until the  $A_2(^{95}\text{Mo})$  is increased to more than 50 MHz. Experimental conditions: microwave frequency, 9.64 GHz; microwave power, 1 mW; modulation frequency, 100 kHz; modulation amplitude, 1.0 mT; time constant, 40.96 ms; conversion time, 48.00 ms; sweep time, 96 s; four scans.

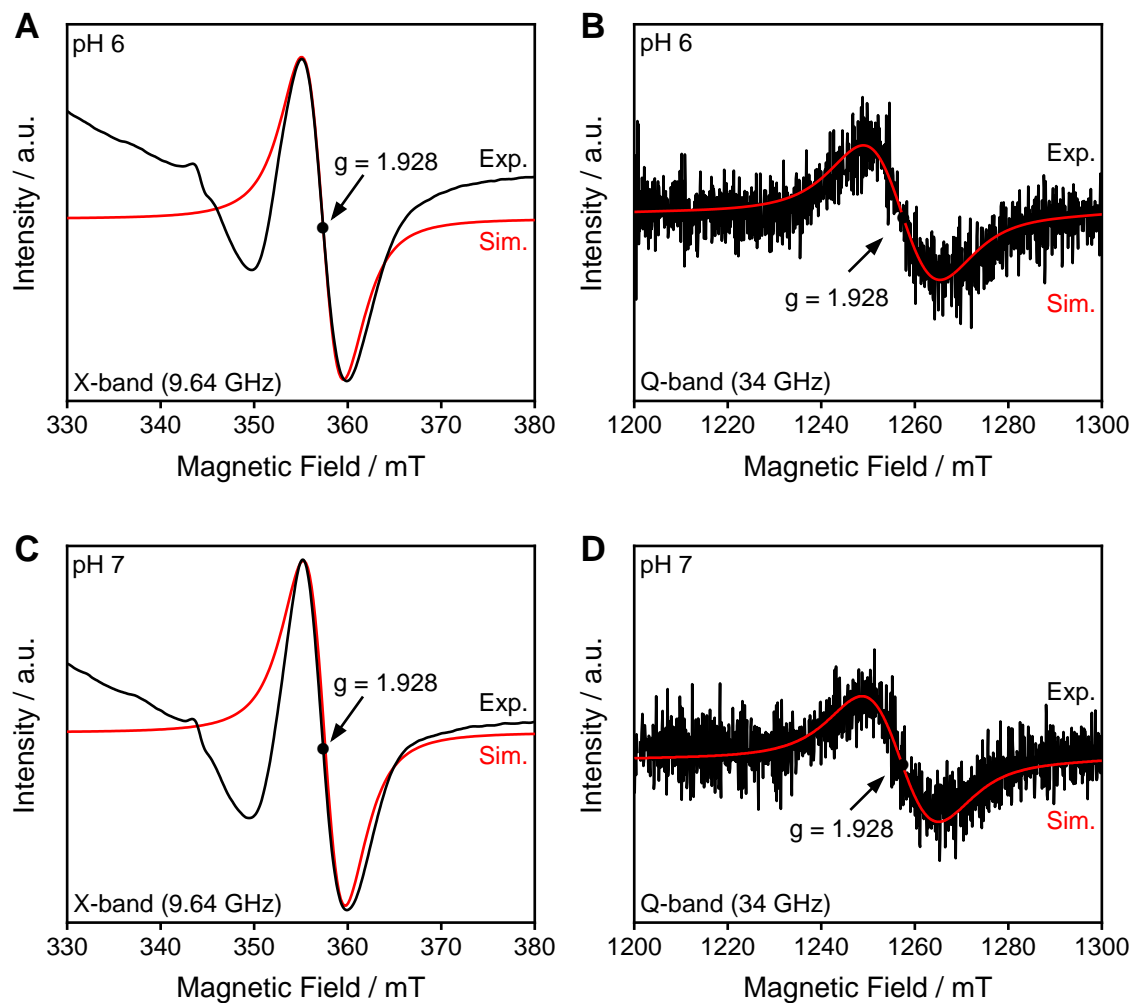

**Fig. S10.** EPR spectra of 1T-MoS<sub>2</sub> at pH 6 and 7. X-band CW-EPR and Q-band derivative ESE-detected EPR spectra of 1T-MoS<sub>2</sub> generated after reduction by 20 mM dithionite at pH 6 (A, B) and 7 (C, D). (black: experimental spectra, red: simulated spectra). The X-band and the Q-band EPR spectrum of Mo<sup>V</sup> species only exhibit an isotropic signal ( $g = 1.928$ ). Experimental conditions: microwave frequency, 9.64 GHz; microwave power, 1 mW; modulation frequency, 100 kHz; modulation amplitude, 1.0 mT; time constant, 40.96 ms; conversion time, 48.00 ms; sweep time, 96 s; four scans.

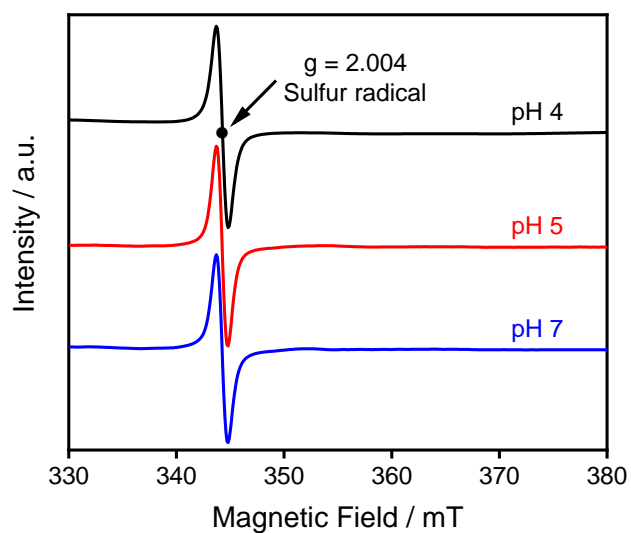

**Fig. S11.** EPR spectra of 2H-MoS<sub>2</sub>. The EPR spectra of 2H-MoS<sub>2</sub> immersed in 20 mM dithionite solution. No changes in the EPR spectrum (350 ~ 370 mT) were observed by changing the pH. Experimental conditions: microwave frequency, 9.64 GHz; microwave power, 1 mW; modulation frequency, 100 kHz; modulation amplitude, 1.0 mT; time constant, 40.96 ms; conversion time, 48.00 ms; sweep time, 96 s; four scans.

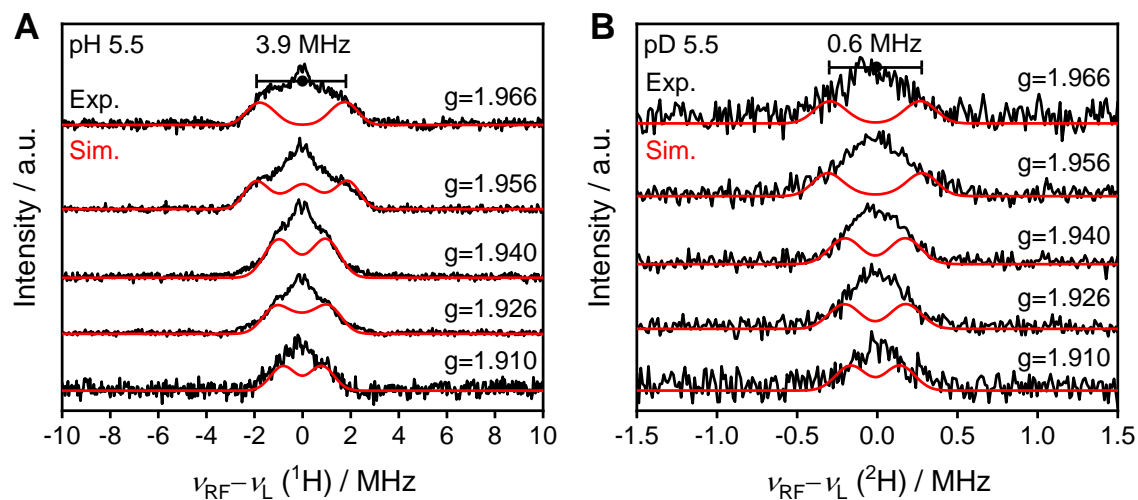

**Fig. S12.** ENDOR spectra of 1T-MoS<sub>2</sub> at pH 5.5. (A) The 2D field-dependent <sup>1</sup>H Davies ENDOR and (B) <sup>2</sup>H Mims ENDOR spectra of 1T-MoS<sub>2</sub> generated after reduction by 20 mM dithionite at pH 5.5 (black lines). The simulated spectra are shown in red. The simulations parameters are as follows: panel A:  $A = [-3.4, 4.5, 2.5]$  MHz, Euler Angle =  $[\alpha, \beta, \gamma] = [90, 115, 20]^\circ$ ; panel B:  $A = [-0.5, 0.7, 0.4]$  MHz, Euler Angle =  $[\alpha, \beta, \gamma] = [90, 115, 20]^\circ$ . Experimental conditions: microwave frequency, 34 GHz;  $T = 30$  K; Davies ENDOR  $\pi/2$  width, 32 ns,  $\tau = 400$  ns, RF pulse width, 20  $\mu$ s; Mims ENDOR  $\pi/2$  width, 32 ns,  $\tau = 200$  ns, RF pulse width, 40  $\mu$ s.

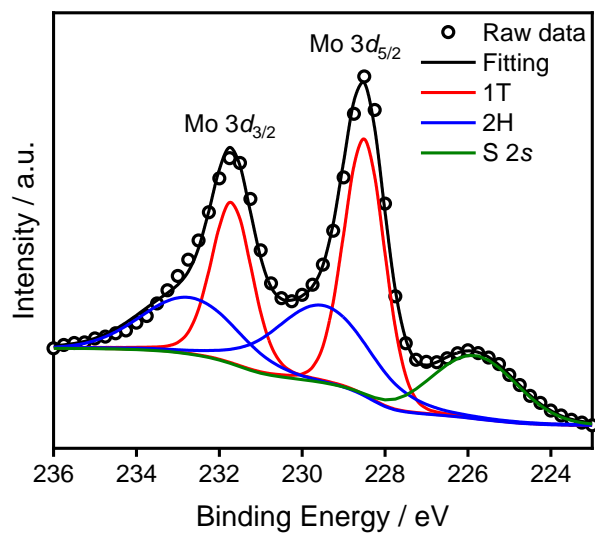

**Fig. S13.** Stability of 1T-MoS<sub>2</sub>. The Mo 3d XPS spectra of 1T-MoS<sub>2</sub> along with the spectral deconvolution after NO<sub>2</sub><sup>-</sup> reduction (0.1 M) at pH 5 for 4 h at 0.1 V vs RHE.

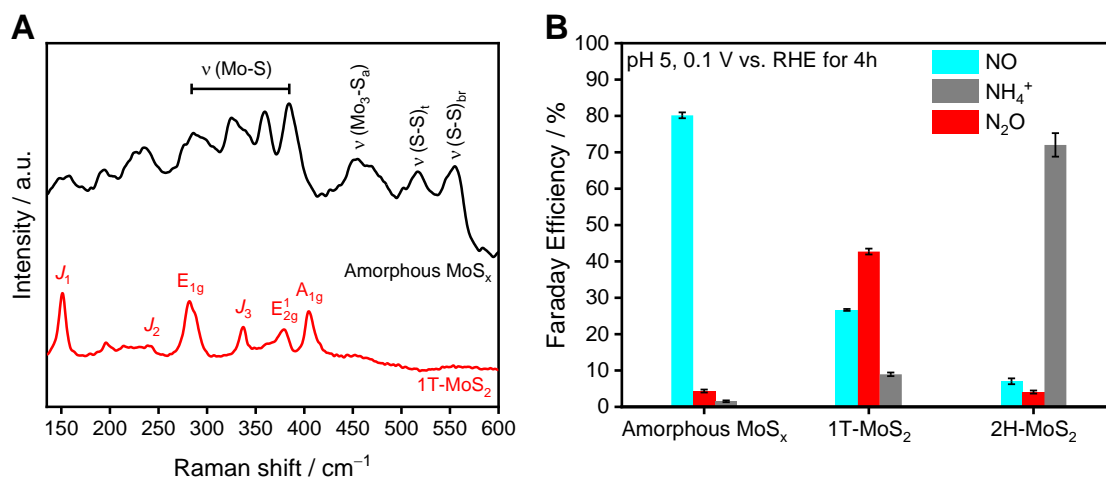

**Fig. S14.** Raman spectra and electrocatalytic performance of amorphous  $\text{MoS}_x$ . (A) Raman spectra of amorphous  $\text{MoS}_x$ . (B) The electrocatalytic performance of amorphous  $\text{MoS}_x$  toward  $\text{NO}_2^-$  reduction at pH 5 and 0.1 V vs RHE for 4 h. The amorphous  $\text{MoS}_x$  was synthesized by electrochemical deposition at room temperature (15). As shown in (A), the spectrum of hydrothermally synthesized 1T- $\text{MoS}_2$  showed clear Raman bands assigned to the 1T phase, and no bands assignable to the amorphous  $\text{MoS}_x$  was resolved under the detection limit of Raman spectroscopy. Furthermore, the electrocatalytic performance in (B) demonstrated that amorphous  $\text{MoS}_x$  selectively produces NO (FE: ~ 80%) and has negligible activity towards  $\text{N}_2\text{O}$  production (FE: ~ 4%), thus ruling out amorphous  $\text{MoS}_x$  as the possible catalytic site for selective N-N coupling.



## SI References

1. Huang, L.B. *et al.* Self-Limited on-Site Conversion of MoO<sub>3</sub> Nanodots into Vertically Aligned Ultrasmall Monolayer MoS<sub>2</sub> for Efficient Hydrogen Evolution. *Adv. Energy Mater.* **8**, 1800734 (2018).
2. Ting, L.R.L. *et al.* Catalytic Activities of Sulfur Atoms in Amorphous Molybdenum Sulfide for the Electrochemical Hydrogen Evolution Reaction. *ACS Catal.* **6**, 861-867 (2016).
3. Deng, Y.L. *et al.* Operando Raman Spectroscopy of Amorphous Molybdenum Sulfide (MoS<sub>x</sub>) during the Electrochemical Hydrogen Evolution Reaction: Identification of Sulfur Atoms as Catalytically Active Sites for H<sup>+</sup> Reduction. *ACS Catal.* **6**, 7790-7798 (2016).
4. Ding, W. *et al.* Highly Ambient-Stable 1T-MoS<sub>2</sub> and 1T-WS<sub>2</sub> by Hydrothermal Synthesis under High Magnetic Fields. *ACS Nano* **13**, 1694-1702 (2019).
5. Yu, Y. *et al.* High phase-purity 1T'-MoS<sub>2</sub>- and 1T'-MoSe<sub>2</sub>-layered crystals. *Nat. Chem.* **10**, 638-643 (2018).
6. Liu, Q. *et al.* Gram-Scale Aqueous Synthesis of Stable Few-Layered 1T-MoS<sub>2</sub>: Applications for Visible-Light-Driven Photocatalytic Hydrogen Evolution. *Small* **11**, 5556-5564 (2015).
7. Calandra, M. Chemically exfoliated single-layer MoS<sub>2</sub>: Stability, lattice dynamics, and catalytic adsorption from first principles. *Phys. Rev. B* **88**, 245428 (2013).
8. Jiménez Sandoval, S., Yang, D., Frindt, R.F. & Irwin, J.C. Raman study and lattice dynamics of single molecular layers of MoS<sub>2</sub>. *Phys. Rev. B* **44**, 3955-3962 (1991).
9. Cheng, P., Sun, K. & Hu, Y.H. Memristive Behavior and Ideal Memristor of 1T Phase MoS<sub>2</sub> Nanosheets. *Nano Lett.* **16**, 572-576 (2016).
10. Purcell-Milton, F. *et al.* Induction of Chirality in Two-Dimensional Nanomaterials: Chiral 2D MoS<sub>2</sub> Nanostructures. *ACS Nano* **12**, 954-964 (2018).
11. Geng, X. *et al.* Pure and stable metallic phase molybdenum disulfide nanosheets for hydrogen evolution reaction. *Nat. Commun.* **7**, 10672 (2016).
12. Busetto, L., Vaccari, A. & Martini, G. Electron-Spin Resonance of Paramagnetic Species as a Tool for Studying the Thermal-Decomposition of Molybdenum Trisulfide. *J. Phys. Chem.* **85**, 1927-1930 (1981).
13. Konings, A.J.A. *et al.* ESR studies on hydrodesulfurization catalysts: Supported and unsupported sulfided molybdenum and tungsten catalysts. *J. Catal.* **54**, 1-12 (1978).
14. Basu, P. Use of EPR Spectroscopy in Elucidating Electronic Structures of Paramagnetic Transition Metal Complexes. *J. Chem. Educ.* **78**, 666-669 (2001).
15. Tran, P.D. *et al.* Coordination polymer structure and revisited hydrogen evolution catalytic mechanism for amorphous molybdenum sulfide. *Nat. Mater.* **15**, 640-646 (2016).
